# Supplementary material for: Genomic islands of divergence and their consequences for the resolution of spatial structure in an exploited marine fish
Source: PubMed Central journal article supplement (PMC3673473; doi:10.1111/eva.12026), 2013-01-21

# LGMAP 2 - Supplemental Information

## CGPIA1

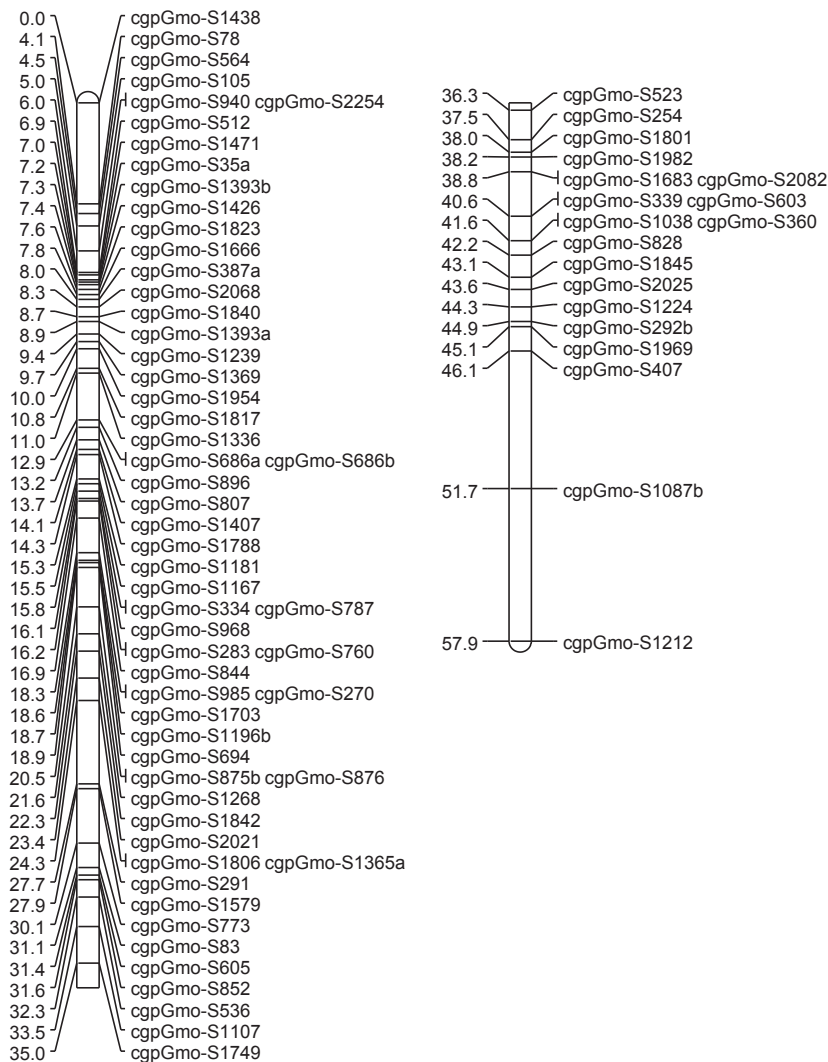

## CGPIA2

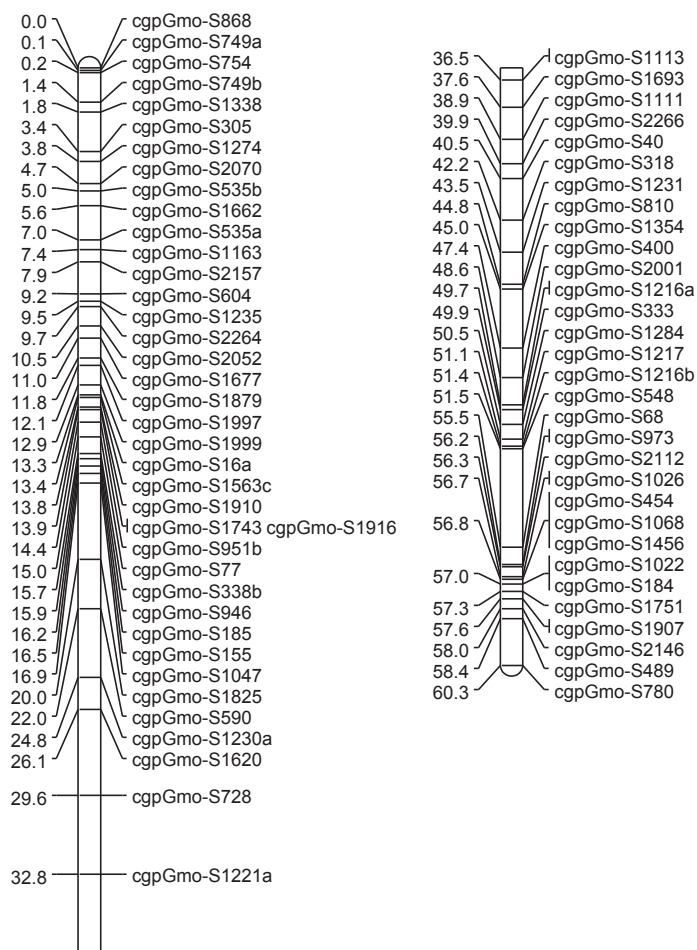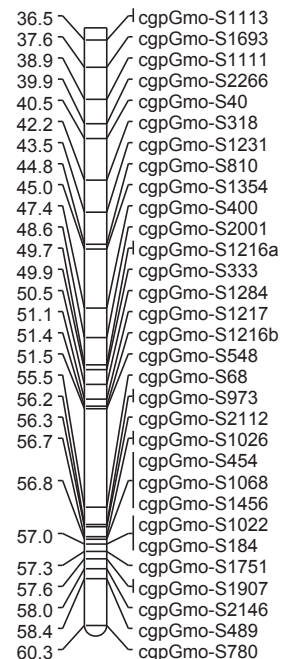

# LGMAP 2

## CGPIA3

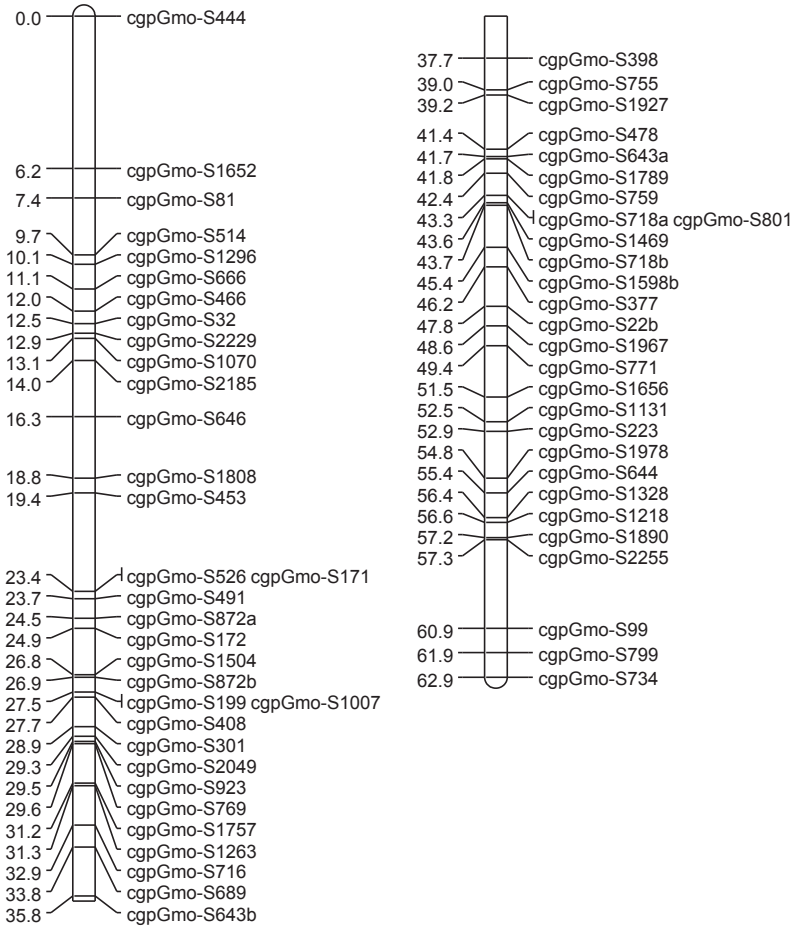

## CGPIA4

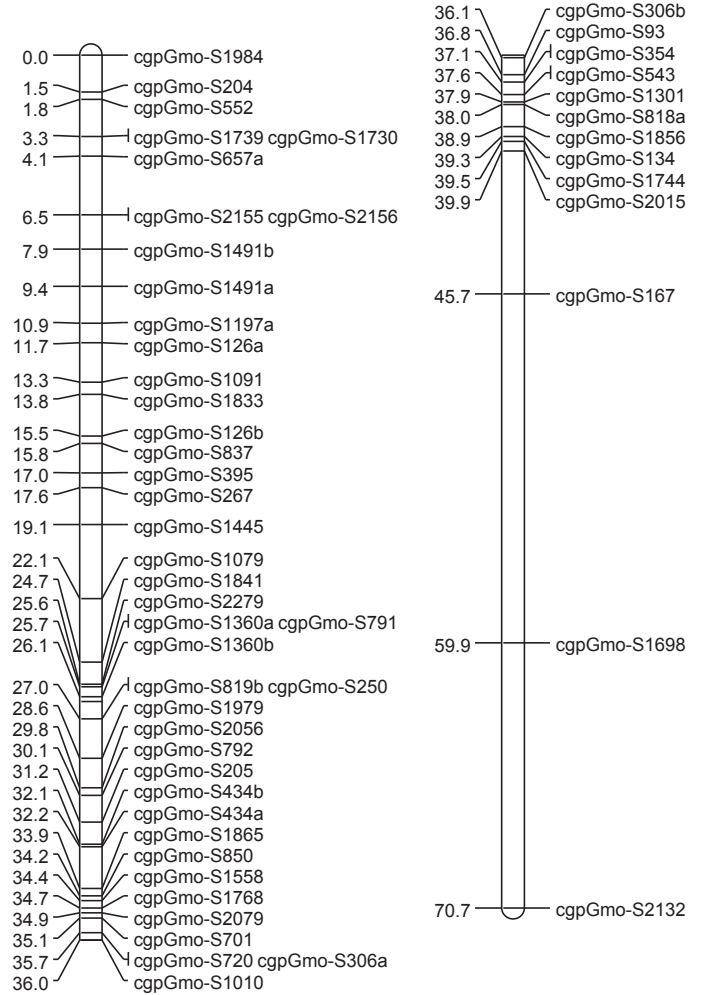

# LGMAP 2

## CGPIA5

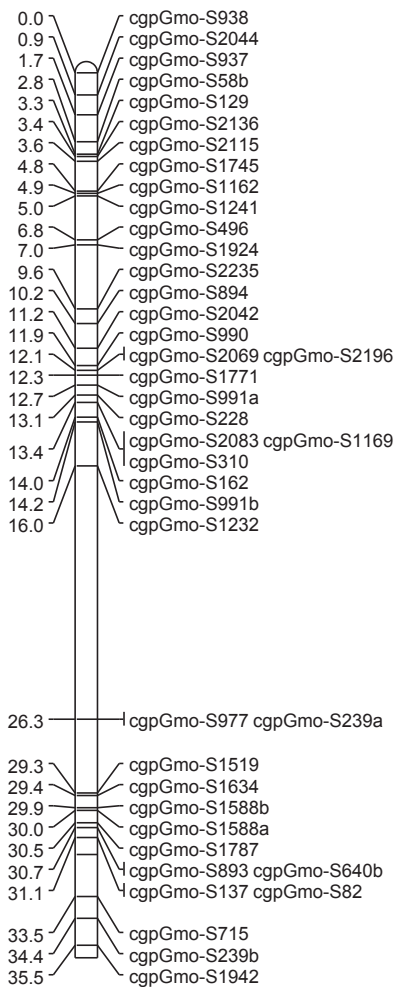

## CGPIA6

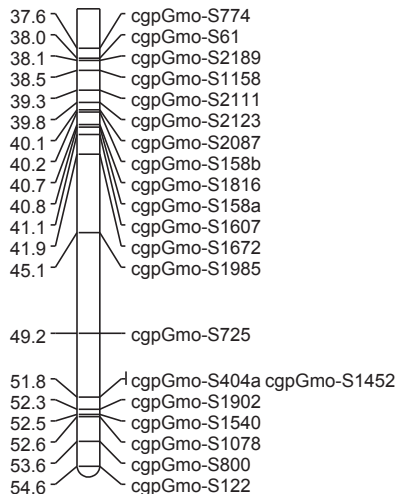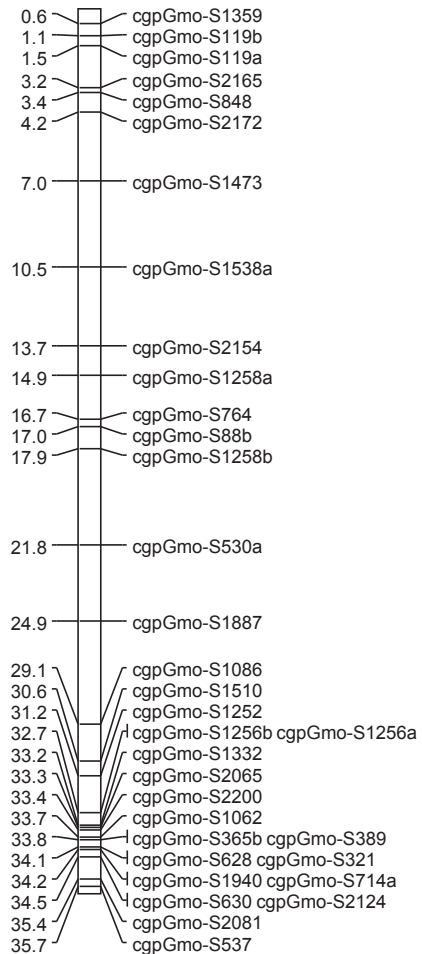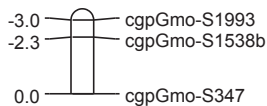

# LGMAP 2

## CGPIA6

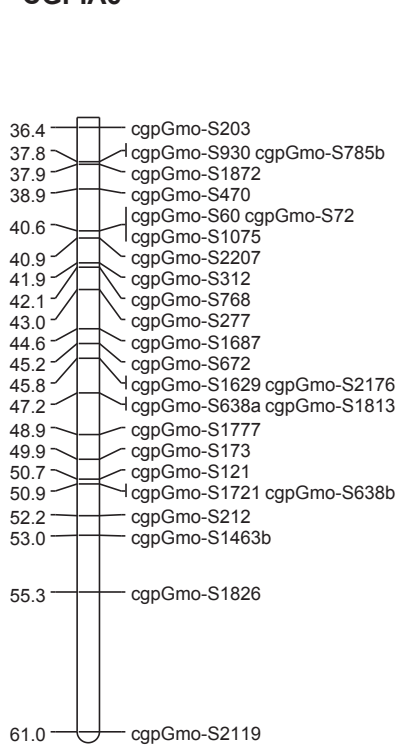

## CGPIA7

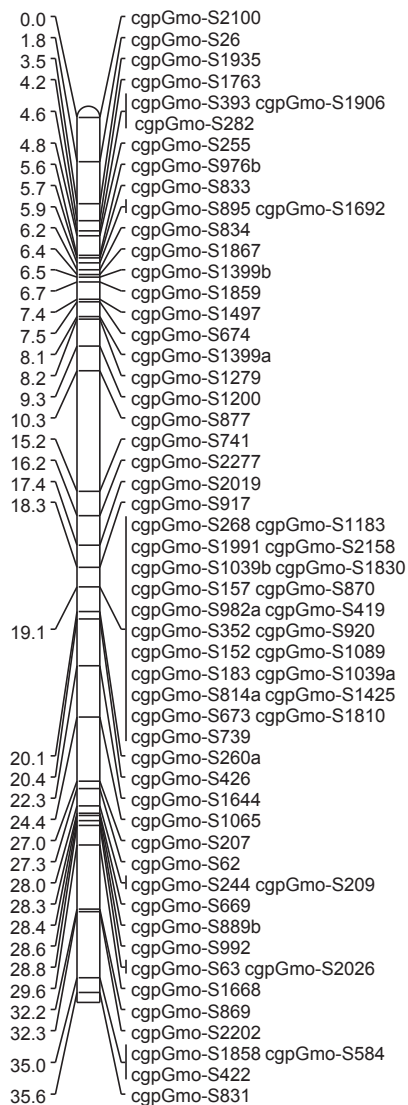

## CGPIA8

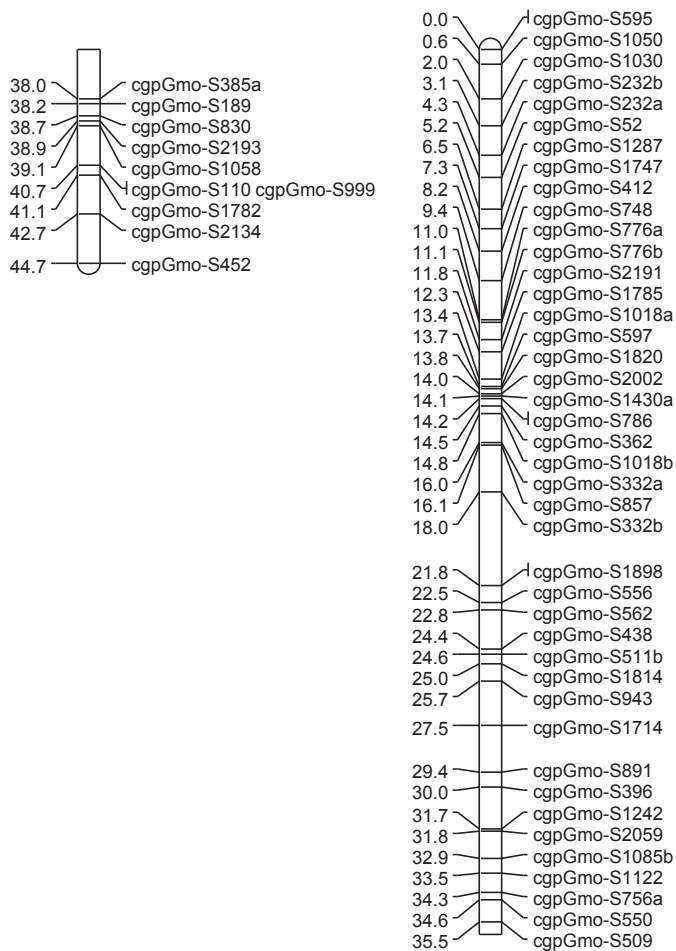

# LGMAP 2

## CGPIA8

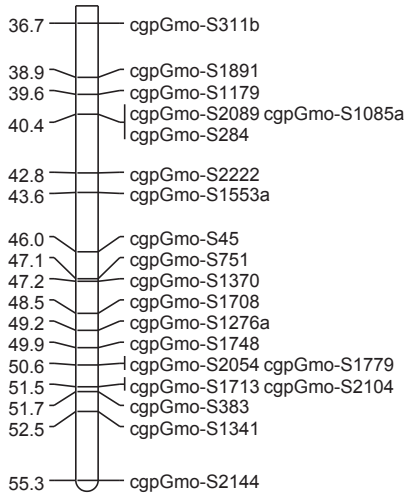

## CGPIA9

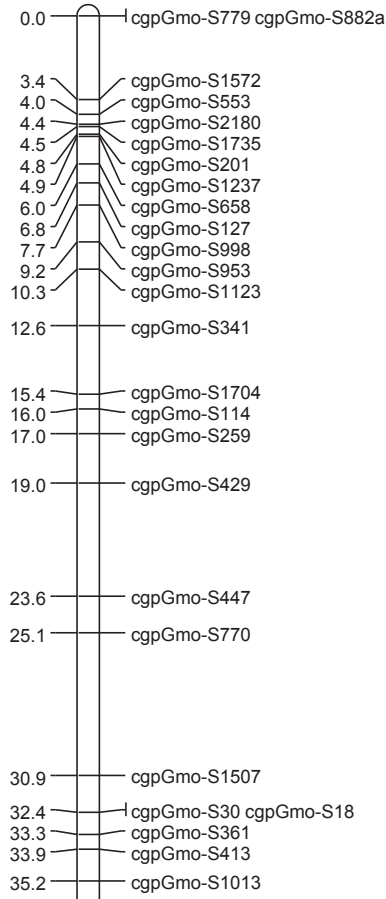

## CGPIA10

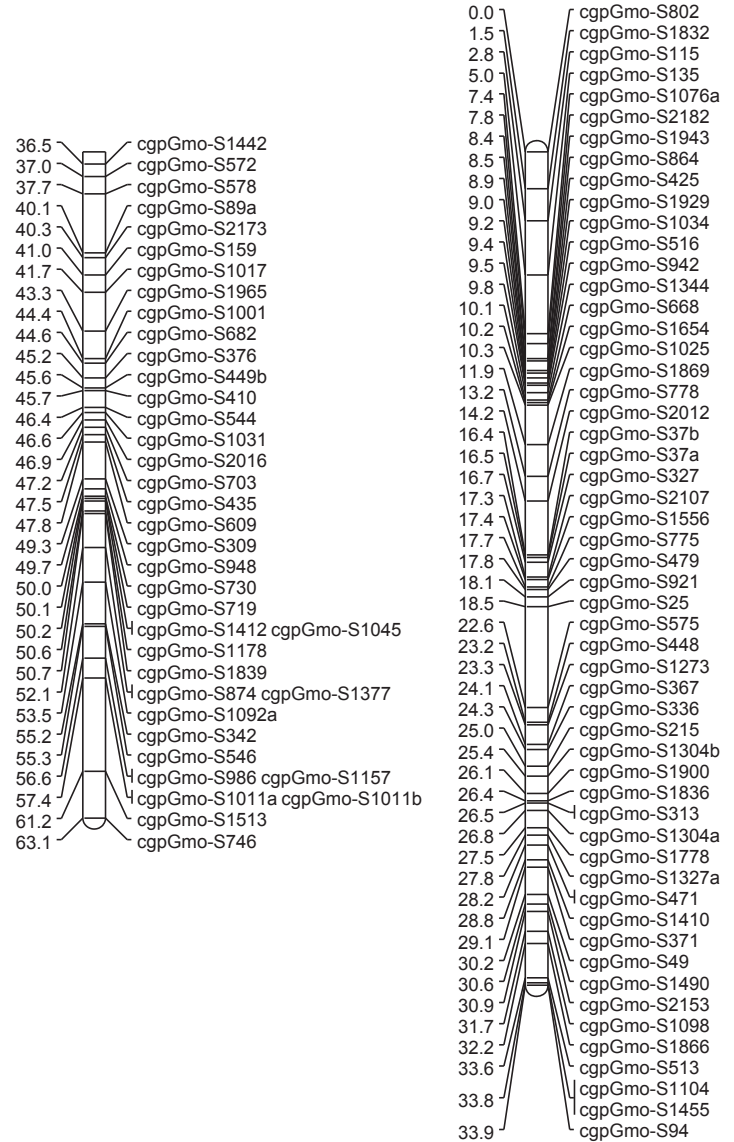

# LGMAP 2

## CGPIA11

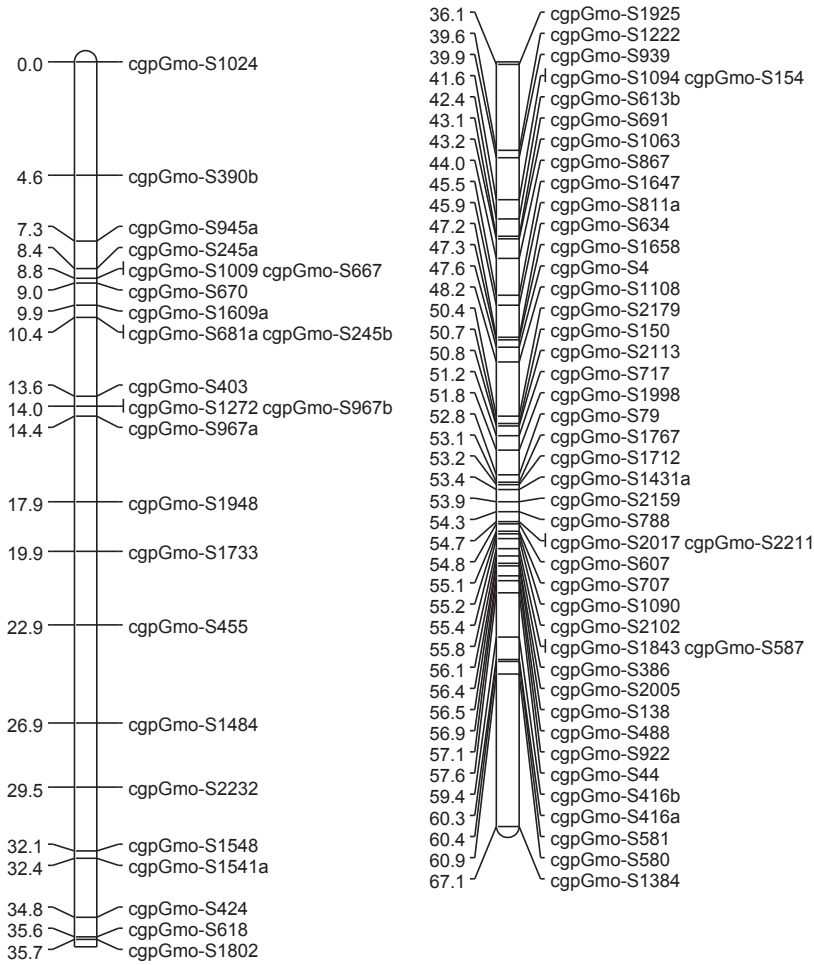

## CGPIA12

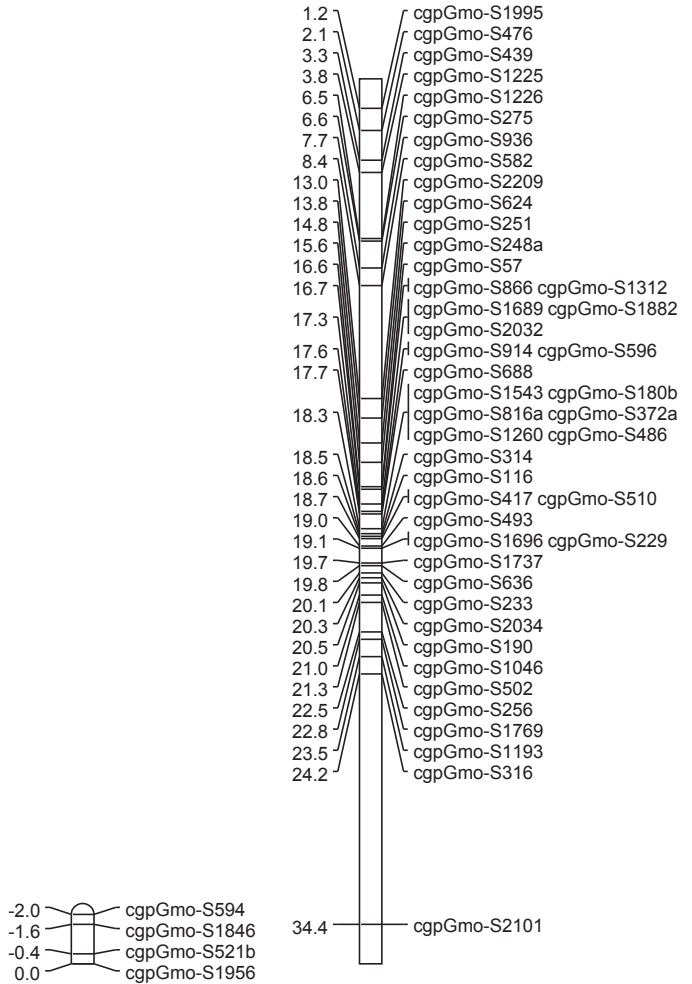

LGMAP 2

CGPIA12

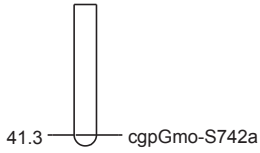

CGPIA13

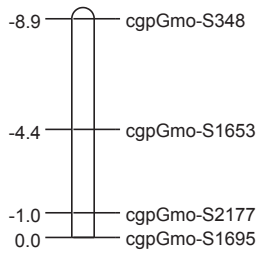

CGPIA13

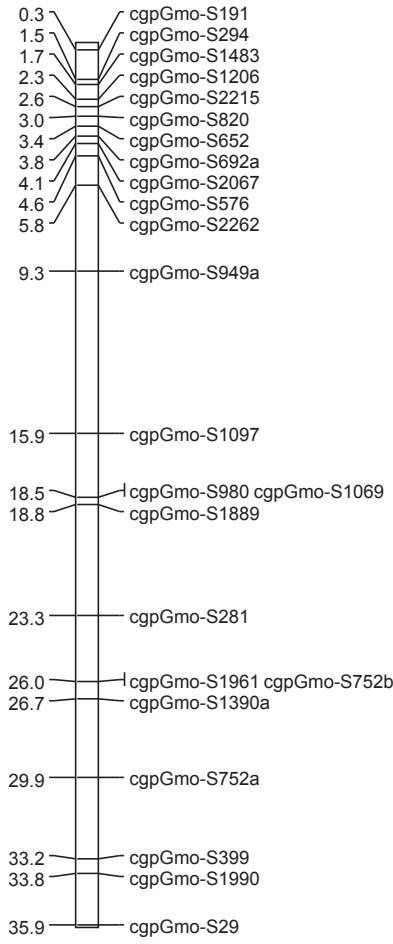

CGPIA13

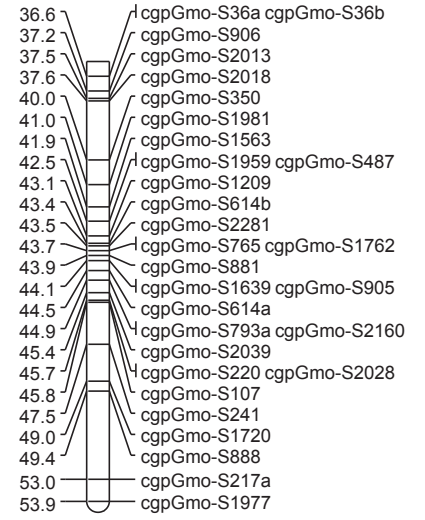

# LGMAP 2

## CGPIA14

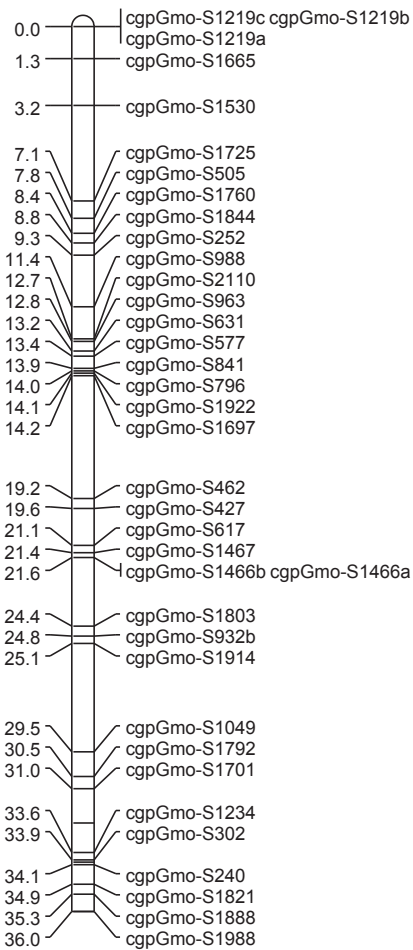

## CGPIA14

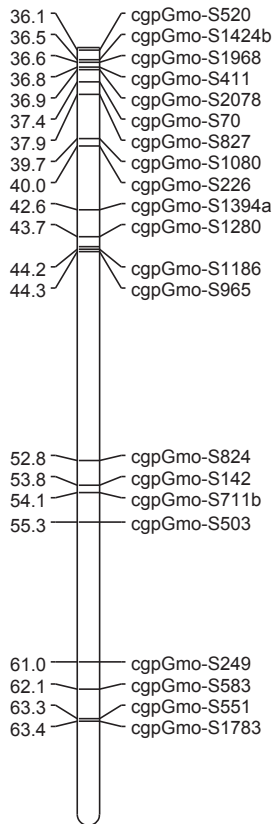

## CGPIA15

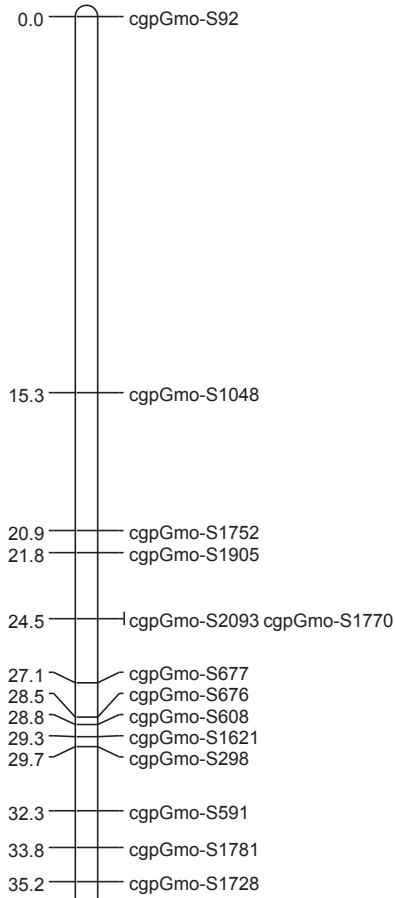

## CGPIA15

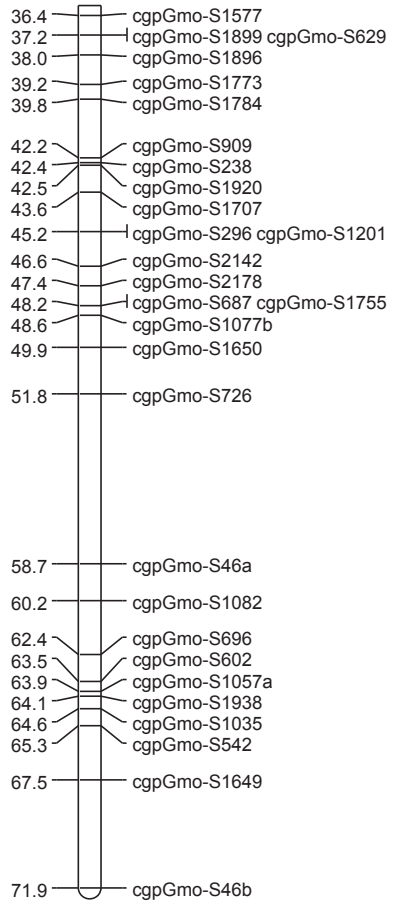



# LGMAP 2

## CGPIA16

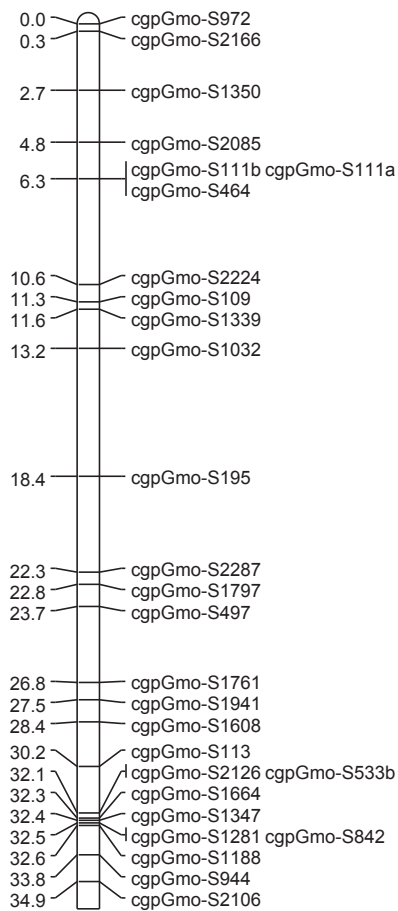

## CGPIA16

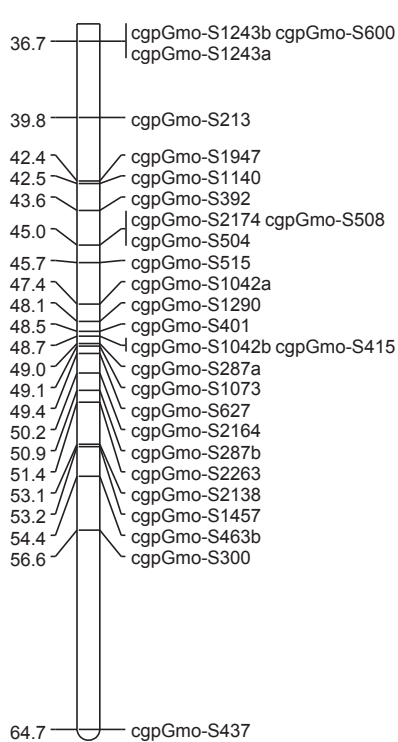

## CGPIA17

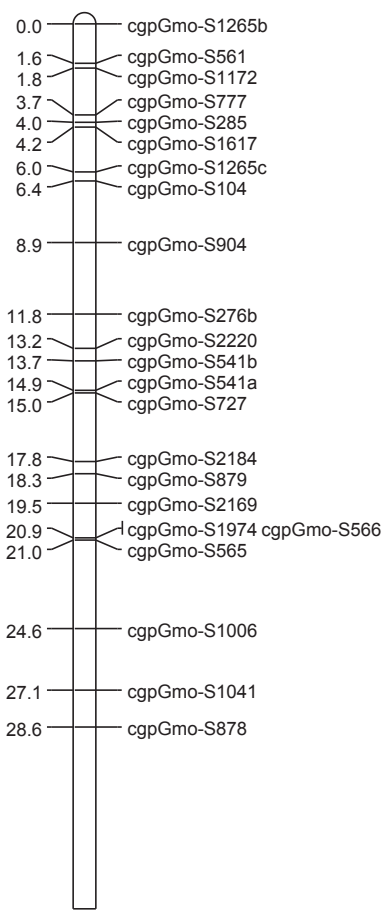

## CGPIA17

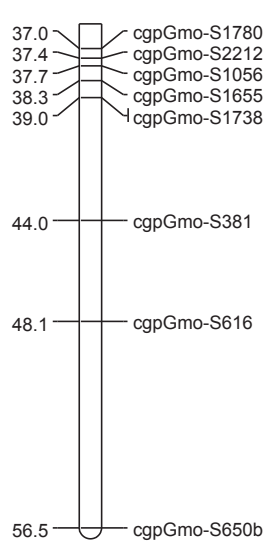

# LGMAP 2

## CGPIA18

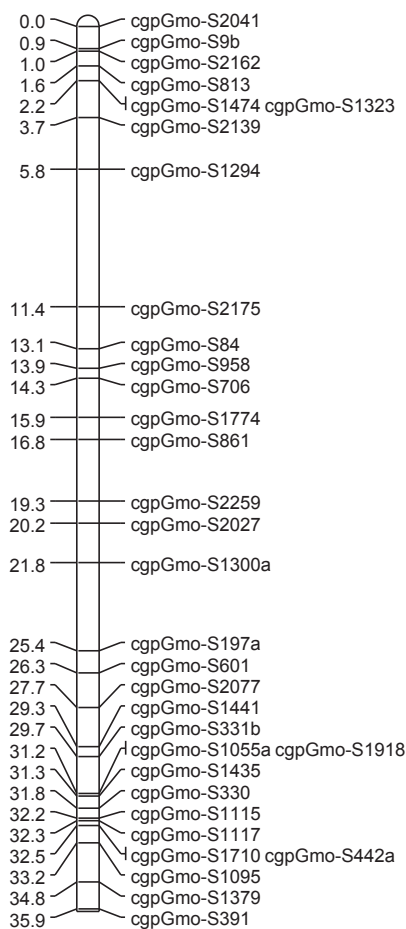

## CGPIA18

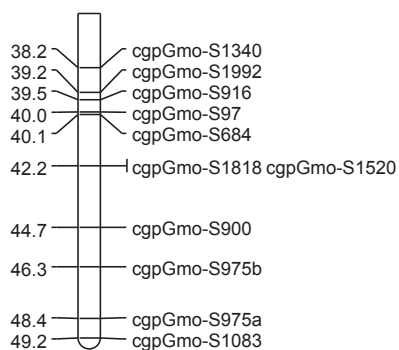

## CGPIA19

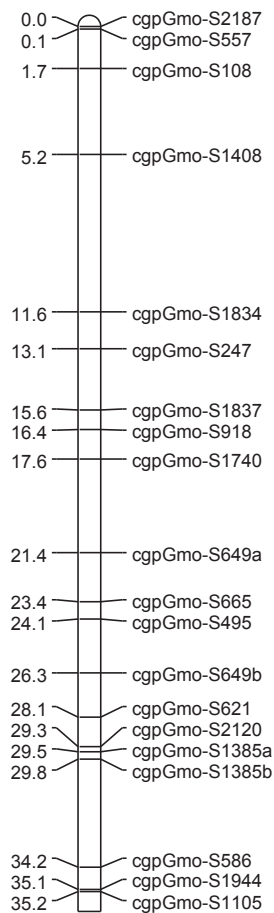

## CGPIA19

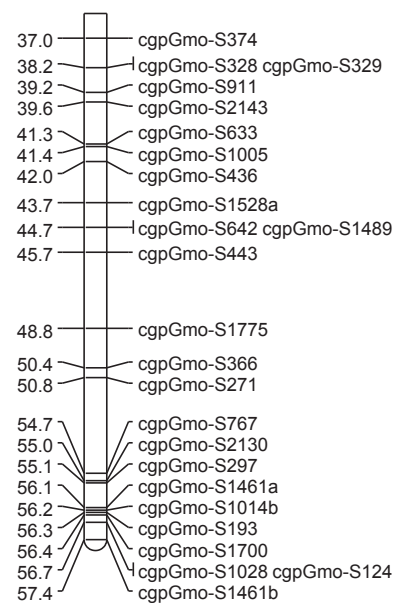

# LGMAP 2

## CGPIA20

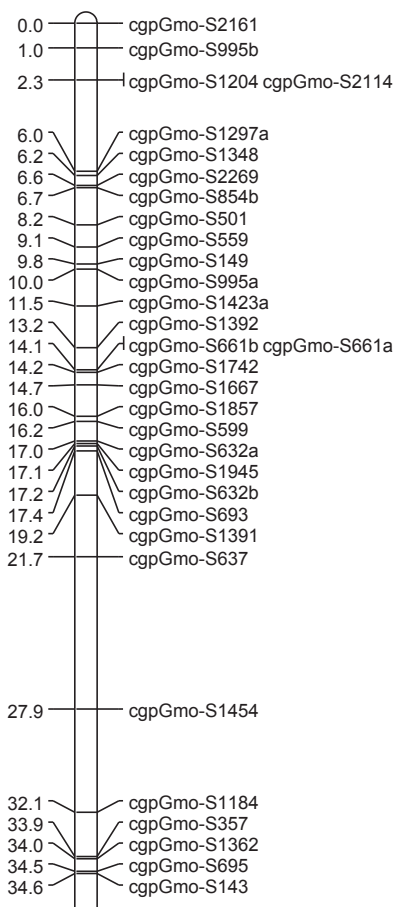

## CGPIA20

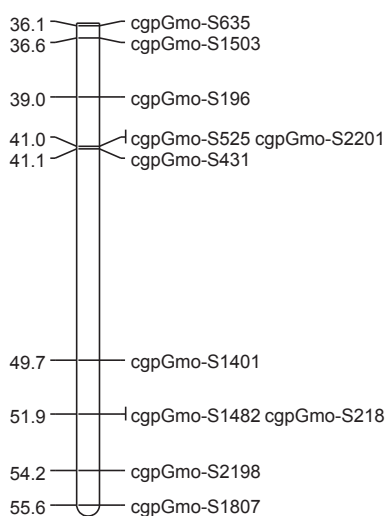

## CGPIA21

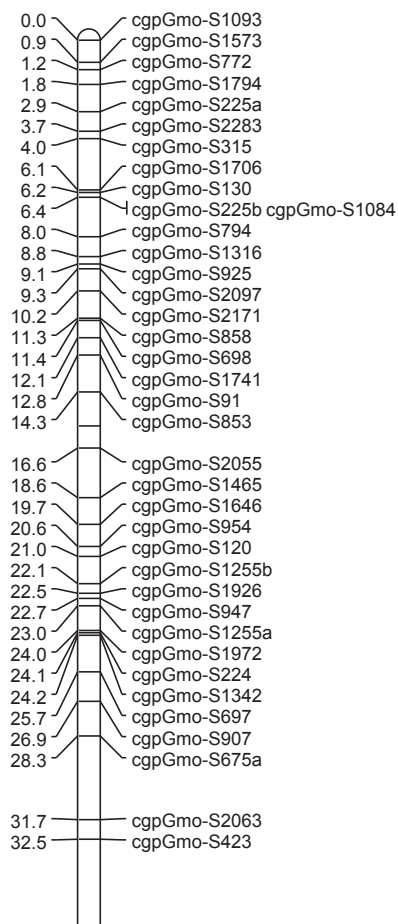

## CGPIA21

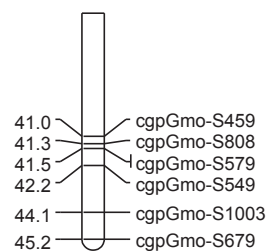

# LGMAP 2

## CGPIA22

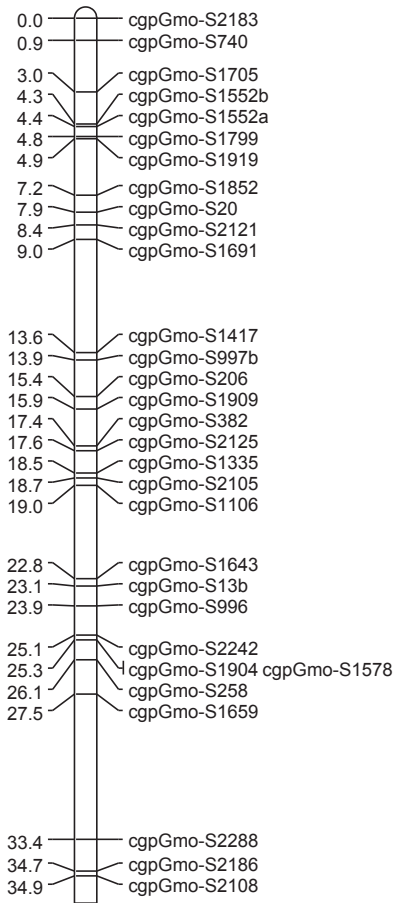

## CGPIA22

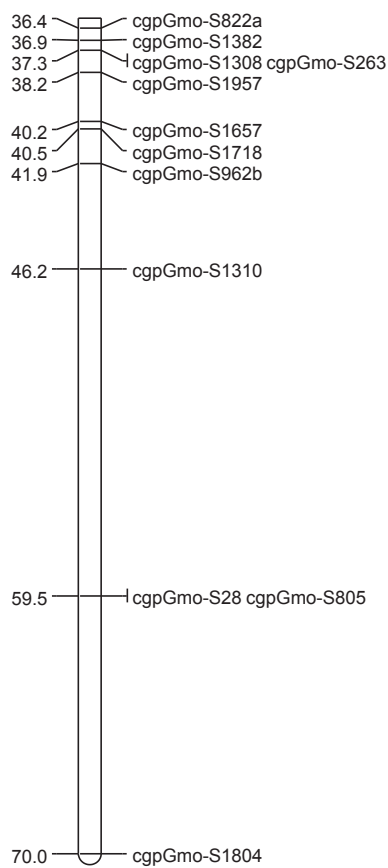

## CGPIA23

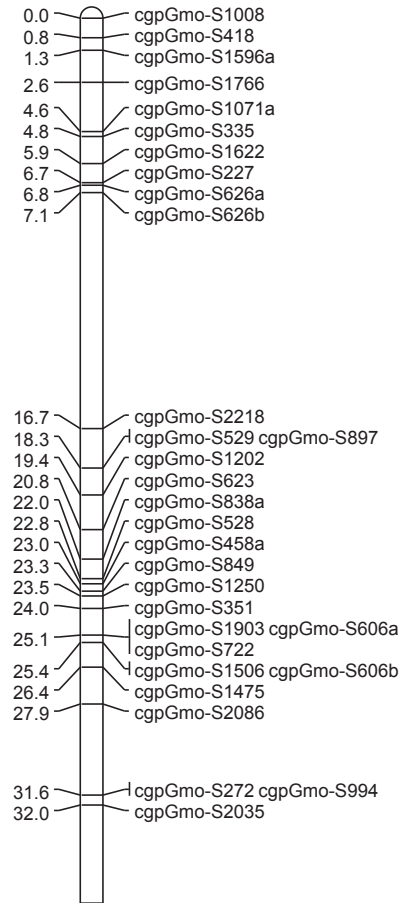

## CGPIA23

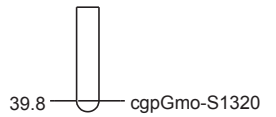

Supplement: eva0006-0450-sd3.pdf [file eva0006-0450-sd3.pdf]
